# Supplementary material
Source: Springer Nature journal article supplement (https://www.springermedizin.de/resource/supplementary/12974_2010_294_MOESM3_ESM.pdf/9601184)

**A. IL-1 $\beta$** 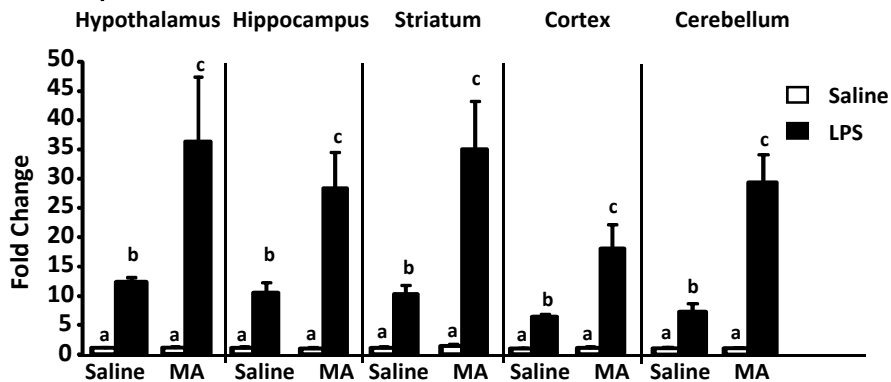**B. IL-6**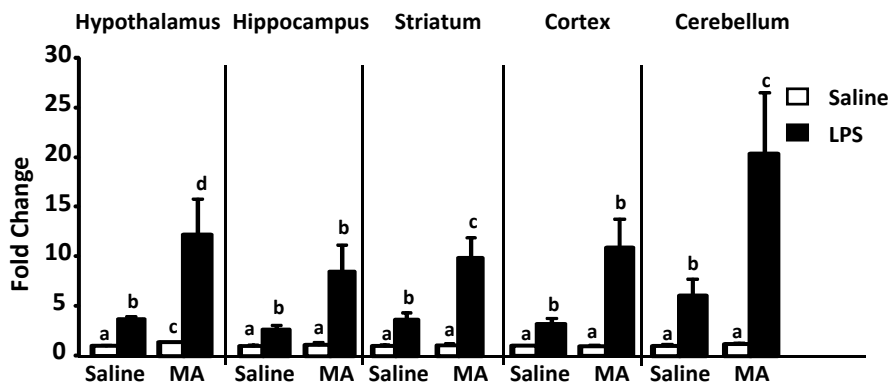**C. TNF $\alpha$** 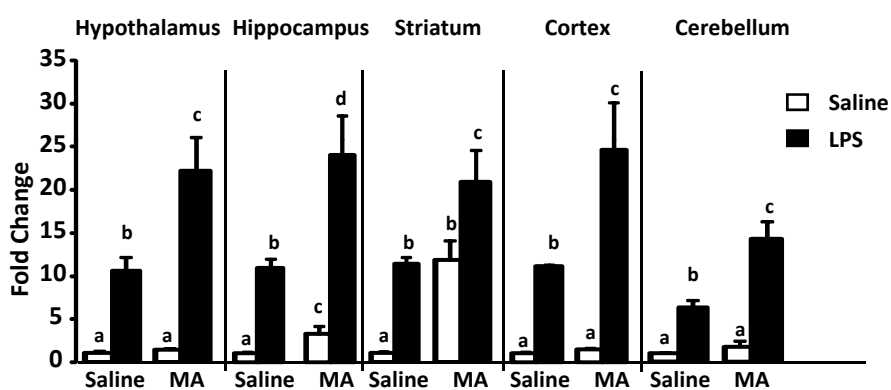

Supplement: MOESM3 [file 9601184]
